# Supplementary material for: Anti-Obesity Drug Delivery Systems: Recent Progress and Challenges
Source: MDPI journal article supplement (doi:10.3390/pharmaceutics15112635), 2023-11-16
Supplement: s1 [file s1]

## Supplementary Information

Table S1. Different clinical trials using DDs for the treatment of obesity and related diseases (ClinicalTrials.gov)

| Delivery system | Title                                                                                                             | Status             | Conditions                                  | Interventions                                            | Phases         | References |
|-----------------|-------------------------------------------------------------------------------------------------------------------|--------------------|---------------------------------------------|----------------------------------------------------------|----------------|------------|
| hydrogels       | Vestibular Stimulation to Trigger Adipose Loss (VeSTAL) Clinical Trial                                            | completed          | Obesity                                     | Device: VeSTAL                                           | not applicable | [1]        |
|                 | Gelesis Glycemic Index Study                                                                                      | completed          | Obesity, Diabetes, Pre-diabetes             | Device: Gelesis200, Other: Water, only (placebo)         | not applicable | [2]        |
| liposomes       | Liposomal Amphotericin B (AmBisome) Pharmacokinetics Given as a Single Intravenous Dose to Obese Patients (ASPEN) | completed          | Morbid obesity                              | Drug: Administration of study drug                       | phase 4        | [3]        |
|                 | Transversus Abdominis Plane (TAP) Block Using Liposomal Bupivacaine in Metabolic and Bariatric Surgery Patients   | not yet recruiting | Morbid Obesity, Bariatric Surgery Candidate | Drug: Liposomal bupivacaine, Drug: Bupivacaine Injection | phase 1        | [4]        |

|                    |                                                                                                     |            |                                                                    |                                                                                                    |                   |     |
|--------------------|-----------------------------------------------------------------------------------------------------|------------|--------------------------------------------------------------------|----------------------------------------------------------------------------------------------------|-------------------|-----|
|                    | Pain Control in Bariatric Patients:<br>EXPAREL(R) vs. the On-Q(R) Pain<br>Ball                      | completed  | Obesity                                                            | Drug: EXPAREL,<br>Drug: On-Q Pain Ball                                                             | phase 4           | [5] |
|                    | Effects of Glutathione (an<br>Antioxidant) and N-Acetylcysteine<br>on Inflammation                  | completed  | Obesity,<br>Hyperlipidemia,<br>Insulin Resistance,<br>Hypertension | Dietary Supplement:<br>Glutathione, Dietary<br>Supplement: N-<br>Acetylcysteine, Other:<br>Placebo | not<br>applicable | [6] |
|                    | The Effect of Curcumin on the<br>Development of Prednisolone-<br>induced Hepatic Insulin Resistance | terminated | Insulin Resistance,<br>on-Alcoholic Fatty<br>Liver Disease         | Drug: Curcumin<br>Liposome, Drug:<br>Prednisolone, Drug:<br>Placebos                               | not<br>applicable | [7] |
| micropartic<br>les | Validation of Circulating Endothelial<br>Cells and Microparticles in Youth                          | terminated | Childhood Obesity,<br>Bariatric Surgery<br>Candidate               |                                                                                                    |                   | [8] |
|                    | Embolization of Arterial Gastric<br>Supply in Obesity                                               | withdrawn  | Morbid Obesity                                                     | Procedure:<br>Emblization of the<br>gastro-epiploic arcade                                         | not<br>applicable | [9] |

|                                                                                        |                    |                                                   |                                                              |                |      |
|----------------------------------------------------------------------------------------|--------------------|---------------------------------------------------|--------------------------------------------------------------|----------------|------|
| Bariatric Embolization Trial for the Obese Nonsurgical                                 | not yet recruiting | Obesity, Weight Loss, Body Weight, Morbid Obesity | Procedure: Left gastric artery embolization                  | phase 1        | [10] |
| TIFACT Study - Tissue Factor Expression by Adipose Tissue in Extremely Obese Subjects. | completed          | Obesity                                           |                                                              |                | [11] |
| Metabolic Effects of Duodenal Jejunal Bypass Liner for Type 2 Diabetes Mellitus        | completed          | Type 2 Diabetes Mellitus, Obesity                 | Device: DJBL (Duodenal jejunal bypass liner, EndoBarrier)    |                | [12] |
| Beetroot Supplementation in Women Enjoying Exercise Together                           | recruiting         | Aging, Postmenopause, Obesity                     | Dietary Supplement: Beetroot Juice, Other: Exercise Training | not applicable | [13] |

|     |                                                                             |                |                                                                                                                           |                                                                              |                  |      |
|-----|-----------------------------------------------------------------------------|----------------|---------------------------------------------------------------------------------------------------------------------------|------------------------------------------------------------------------------|------------------|------|
|     | Homocysteine After Laparoscopic Roux-en-Y Gastric Bypass                    | completed      | Obesity, Morbid, Homocystine; Metabolic Disorder, Bariatric Surgery Candidate, Folate Deficiency, Vitamin B 12 Deficiency | Procedure: laparoscopic long limb roux-en-Y gastric bypass                   |                  | [14] |
|     | Efficacy of Oral Vitamin D Supplementation in Adolescents and Young Adults. | unknown status | Overweight and Obesity, Overweight Adolescents, Vitamin D Deficiency                                                      | Dietary Supplement: 1000 IU D vitamin, Dietary Supplement: 200 IU D vitamin  | not applicable   | [15] |
| MNs | Insulin Delivery Using MNs in Type 1 Diabetes                               | completed      | Type 1 Diabetes Mellitus                                                                                                  | Device: Microneedle, Device: Subcutaneous insulin catheter                   | phase 2, phase 3 | [16] |
|     | Glucose Measurement Using Microneedle Patches                               | completed      | Diabetes                                                                                                                  | Device: Microneedle patch, Device: Intravenous (IV) catheter, Device: Lancet | not applicable   | [17] |

|                                                                                                                 |                |                 |                                                                                                                      |                  |      |
|-----------------------------------------------------------------------------------------------------------------|----------------|-----------------|----------------------------------------------------------------------------------------------------------------------|------------------|------|
| Enhanced Epidermal Antigen Specific Immunotherapy Trial -1                                                      | unknown status | Type 1 Diabetes | Drug: C19-A3 GNP                                                                                                     | phase 1          | [18] |
| Pharmacokinetic Comparison of Intradermal Versus Sub-Cutaneous Insulin and Glucagon Delivery in Type 1 Diabetes | unknown status | Type 1 Diabetes | Procedure: Intradermal injection, Procedure: Subcutaneous injection                                                  | phase 2          | [19] |
| Multi-day (3) In-patient Evaluation of Intradermal Versus Subcutaneous Basal and Bolus Insulin Infusion         | completed      | Diabetes        | Device: Subcutaneous delivery via Medtronic Quick-Set, Device: Intradermal delivery via the BD Research Catheter Set | phase 1, phase 2 | [20] |

|     |                                                                                                                      |                |                                                        |                                                                                                                                          |                     |      |
|-----|----------------------------------------------------------------------------------------------------------------------|----------------|--------------------------------------------------------|------------------------------------------------------------------------------------------------------------------------------------------|---------------------|------|
|     | Pharmacokinetics/Dynamics of Basal (Continuous) Insulin Infusion Administered Either Intradermally or Subcutaneously | completed      | Diabetes Mellitus, Type 1<br>diabètes Mellitus, Type 2 | Device: Intradermal insulin delivery: BD Research Catheter Set,<br>Device: Subcutaneous insulin delivery: ACCU-CHEK Rapid-D Infusion Set | phase 2             | [21] |
|     | Suprachoroidal Injection of CLS-TA Alone or With Aflibercept in Subjects with Diabetic Macular Edema                 | completed      | Diabetic Macular Edema                                 | Drug : IVT Aflibercept, Drug : SC CLS-TA                                                                                                 | phase 1,<br>phase 2 | [22] |
|     | Enhanced Epidermal Antigen Specific Immunotherapy Trial -1                                                           | unknown status | Type 1 Diabetes                                        | Drug: C19-A3 GNP                                                                                                                         | phase 1             | [18] |
| NPs | Imaging Inflammation in Autoimmune Diabetes                                                                          | completed      | Diabetes Mellitus, Type 1                              |                                                                                                                                          |                     | [23] |

|                                                                                                     |                        |                                                                                   |                                                                                                                                          |                  |      |
|-----------------------------------------------------------------------------------------------------|------------------------|-----------------------------------------------------------------------------------|------------------------------------------------------------------------------------------------------------------------------------------|------------------|------|
| Capsaicin NP in Patient with Painful Diabetic Neuropathy                                            | unknown status         | Painful Diabetic Neuropathy                                                       | Drug: 0.75% capsaicin NP cream, Drug: Placebo                                                                                            | phase 2, phase 3 | [24] |
| Host-microbiota-environment Interactions                                                            | not yet recruiting     | Juvenile Idiopathic Arthritis, Diabetes type1 Inflammatory Bowel Diseases         | Other: Stool sample                                                                                                                      |                  | [25] |
| Clinical Application of Mesenchymal Stem Cells Seeded in Chitosan Scaffold for Diabetic Foot Ulcers | unknown status         | Stem Cell Transplant                                                              | Drug: Stem Cell Product                                                                                                                  | phase 1          | [26] |
| The Role of Eicosanoids in the Cardiovascular Actions of Inhaled NPs                                | active, not recruiting | Blood Biomarkers, Vasodilation, Blood Clotting, Lung Function, Healthy Volunteers | Other: diesel exhaust particulate, Other: carbon NPs, Other: small graphene oxide, Other: ultrasmall graphene oxide, Other: filtered air | not applicable   | [27] |

|                                                                                                                                             |            |                              |                                                               |                  |      |
|---------------------------------------------------------------------------------------------------------------------------------------------|------------|------------------------------|---------------------------------------------------------------|------------------|------|
| the Accuracy and Safety of Coronary Artery Contrast-enhanced Magnetic Resonance Imaging with Polysaccharide Superparamagnetic Iron Oxide NP | recruiting | Coronary Heart Disease       | Drug: domestic polysaccharide superparamagnetic iron oxide NP | phase 1          | [28] |
| Prevention of Restenosis Following Revascularization                                                                                        | terminated | Vascular Disease, Peripheral | Drug: NP Paclitaxel                                           | phase 2          | [29] |
| Use of NP Paclitaxel (ABI-007) for the Prevention of In-Stent Restenosis                                                                    | completed  | Coronary Restenosis          | Drug: NP Paclitaxel                                           | phase 1, phase 2 | [30] |



---

|                                                                                                 |                        |                                                        |                                                                                                       |                  |      |
|-------------------------------------------------------------------------------------------------|------------------------|--------------------------------------------------------|-------------------------------------------------------------------------------------------------------|------------------|------|
| Treatment of Patients with Atherosclerotic Disease with Methotrexate-associated to LDL Like NPs | recruiting             | Atherosclerosis, Coronary Artery Disease, Inflammation | Drug: Methotrexate-LD, Drug: Placebo-LDE                                                              | phase 2, phase 3 | [31] |
| <hr/>                                                                                           |                        |                                                        |                                                                                                       |                  |      |
| Treatment of Patients with Atherosclerotic Disease with Paclitaxel-associated to LDL Like NPs   | active, not recruiting | Coronary Artery Disease, Atherosclerosis, Inflammation | Drug: LDE-Paclitaxel, Drug: LDE-Placebo                                                               | phase 2, phase 3 | [32] |
| <hr/>                                                                                           |                        |                                                        |                                                                                                       |                  |      |
| Transforming NP Dressing for Management of Chronic Venous Ulcers                                | completed              | Chronic Venous Hypertension with Ulcer                 | Combination Product: Transforming NP dressing, Combination Product: Conventional compression dressing | phase 4          | [33] |
| <hr/>                                                                                           |                        |                                                        |                                                                                                       |                  |      |
| Magnetic NPs System in Acute Coronary Syndrome                                                  | active, not recruiting | Acute Coronary Syndrome                                |                                                                                                       |                  | [34] |

---

|                                                                                                                |            |                                                                                    |                                                                                                     |                |      |
|----------------------------------------------------------------------------------------------------------------|------------|------------------------------------------------------------------------------------|-----------------------------------------------------------------------------------------------------|----------------|------|
| Plasmonic Nanophotothermal Therapy of Atherosclerosis                                                          | completed  | Stable Angin,  Heart Failure, Atherosclerosis, Multivessel Coronary Artery Disease | Procedure: Transplantation of NPs, Procedure: Transplantation of iron-bearing NPs, Device: Stenting | not applicable | [35] |
| Paclitaxel Albumin-Stabilized NP Formulation in Treating Patients with Relapsed or Refractory Multiple Myeloma | terminated | Refractory Plasma Cell Myeloma                                                     | Drug: Paclitaxel Albumin-Stabilized NP Formulation, Other: Laboratory Biomarker Analysis            | phase 2        | [36] |

## References

- [1] Gelesis, I. inVentiv Health Clinical, Gelesis Glycemic Index Study. 2017. Available online: <https://ClinicalTrials.gov/show/NCT03124134> (accessed on).
- [2] Neurovalens Ltd., S.D. University of California, University of Ulster, Exploristics, Compliance Solutions Ltd., Vestibular Stimulation to Trigger Adipose Loss (VeSTAL) Clinical Trial. 2019. Available online: <https://ClinicalTrials.gov/show/NCT03640286> (accessed on).
- [3] Liposomal Amphotericin B (AmBisome) Pharmacokinetics Given as a Single Intravenous Dose to Obese Patients (ASPEN), (n.d.). Available online: <https://ClinicalTrials.gov/show/NCT02320604> (accessed on).
- [4] Transversus Abdominis Plane (TAP) Block Using Liposomal Bupivacaine in Metabolic and Bariatric Surgery Patients, (n.d.). Available online: <https://ClinicalTrials.gov/show/NCT05537883> (accessed on).
- [5] Pain Control in Bariatric Patients: EXPAREL(R) vs. the On-Q(R) Pain Ball, (n.d.). Available online: <https://ClinicalTrials.gov/show/NCT02142829> (accessed on).
- [6] Effects of Glutathione (an Antioxidant) and N-Acetylcysteine on Inflammation, (n.d.). Available online: <https://ClinicalTrials.gov/show/NCT01550432> (accessed on).

- [7] The Effect of Curcumin on the Development of Prednisolone-induced Hepatic Insulin Resistance, (n.d.). Available online: <https://ClinicalTrials.gov/show/NCT04315350> (accessed on).
- [8] Validation of Circulating Endothelial Cells and Microparticles in Youth, (n.d.). Available online: <https://ClinicalTrials.gov/show/NCT01508598> (accessed on).
- [9] Embolization of Arterial Gastric Supply in Obesity, (n.d.). Available online: <https://ClinicalTrials.gov/show/NCT04207424> (accessed on).
- [10] Bariatric Embolization Trial for the Obese Nonsurgical, (n.d.). Available online: <https://ClinicalTrials.gov/show/NCT03601273> (accessed on).
- [11] TIFACT Study—Tissue Factor Expression by Adipose Tissue in Extremely Obese Subjects, (n.d.). Available online: <https://ClinicalTrials.gov/show/NCT00379704> (accessed on).
- [12] Metabolic Effects of Duodenal Jejunal Bypass Liner for Type 2 Diabetes Mellitus, (n.d.). Available online: <https://ClinicalTrials.gov/show/NCT02800668> (accessed on).
- [13] Beetroot Supplementation in Women Enjoying Exercise Together, (n.d.). Available online: <https://ClinicalTrials.gov/show/NCT04370756> (accessed on).
- [14] Homocysteine After Laparoscopic Roux-en-Y Gastric Bypass, (n.d.). Available online: <https://ClinicalTrials.gov/show/NCT03489538> (accessed on).
- [15] Efficacy of Oral Vitamin D Supplementation in Adolescents and Young Adults, (n.d.). Available online: <https://ClinicalTrials.gov/show/NCT04377386> (accessed on).
- [16] Emory University, Thrasher Research Fund, Insulin Delivery Using Microneedles in Type 1 Diabetes. 2008. Available online: <https://ClinicalTrials.gov/show/NCT00837512> (accessed on).
- [17] Emory University, Glucose Measurement Using Microneedle Patches. 2017. Available online: <https://ClinicalTrials.gov/show/NCT02682056> (accessed on).
- [18] Cardiff University, Enhanced Epidermal Antigen Specific Immunotherapy Trial-1. 2016. Available online: <https://ClinicalTrials.gov/show/NCT02837094> (accessed on).
- [19] Massachusetts General Hospital, Pharmacokinetic Comparison of Intradermal Versus Sub-cutaneous Insulin and Glucagon Delivery in Type 1 Diabetes. 2012. Available online: <https://ClinicalTrials.gov/show/NCT01684956> (accessed on).
- [20] Becton, D. Company, Multi-day (3) In-Patient Evaluation of Intradermal Versus Subcutaneous Basal and Bolus Insulin Infusion. 2012. Available online: <https://ClinicalTrials.gov/show/NCT01557907> (accessed on).
- [21] Becton, D. Company, Pharmacokinetics/Dynamics of Basal (Continuous) Insulin Infusion Administered Either Intradermally or Subcutaneously. 2010. Available online: <https://ClinicalTrials.gov/show/NCT01061216> (accessed on).

- [22] Biomedical, I.C. Suprachoroidal Injection of CLS-TA Alone or with Aflibercept in Subjects with Diabetic Macular Edema. 2016. Available online: <https://ClinicalTrials.gov/show/NCT02949024> (accessed on).
- [23] Imaging Inflammation in Autoimmune Diabetes, (n.d.). Available online: <https://ClinicalTrials.gov/show/NCT00585936> (accessed on).
- [24] Capsaicin Nanoparticle in Patient With Painful Diabetic Neuropathy, (n.d.). Available online: <https://ClinicalTrials.gov/show/NCT01125215> (accessed on).
- [25] Host-Microbiota-Environment Interactions, (n.d.). Available online: <https://ClinicalTrials.gov/show/NCT05176795> (accessed on).
- [26] Clinical Application of Mesenchymal Stem Cells Seeded in Chitosan Scaffold for Diabetic Foot Ulcers, (n.d.). Available online: <https://ClinicalTrials.gov/show/NCT03259217> (accessed on).
- [27] The Role of Eicosanoids in the Cardiovascular Actions of Inhaled Nanoparticles, (n.d.). Available online: <https://ClinicalTrials.gov/show/NCT03659864> (accessed on).
- [28] The Accuracy and Safety of Coronary Artery Contrast-enhanced Magnetic Resonance Imaging With Polysaccharide Superparamagnetic Iron Oxide Nanoparticle, (n.d.). Available online: <https://ClinicalTrials.gov/show/NCT05032937> (accessed on).
- [29] Prevention of Restenosis Following Revascularization, (n.d.). Available online: <https://ClinicalTrials.gov/show/NCT00518284> (accessed on).
- [30] Use of Nanoparticle Paclitaxel (ABI-007) for the Prevention of In-Stent Restenosis, (n.d.). Available online: <https://ClinicalTrials.gov/show/NCT00124943> (accessed on).
- [31] Treatment of Patients With Atherosclerotic Disease With Methotrexate-associated to LDL Like Nanoparticles, (n.d.). Available online: <https://ClinicalTrials.gov/show/NCT04616872> (accessed on).
- [32] Treatment of Patients With Atherosclerotic Disease With Paclitaxel-associated to LDL Like Nanoparticles, (n.d.). Available online: <https://ClinicalTrials.gov/show/NCT04148833> (accessed on).
- [33] Transforming Nanoparticle Dressing For Management of Chronic Venous Ulcers, (n.d.). Available online: <https://ClinicalTrials.gov/show/NCT04793074> (accessed on).
- [34] Magnetic Nanoparticles System in Acute Coronary Syndrome, (n.d.). Available online: <https://ClinicalTrials.gov/show/NCT02226523> (accessed on).
- [35] Plasmonic Nanophotothermal Therapy of Atherosclerosis, (n.d.). Available online: <https://ClinicalTrials.gov/show/NCT01270139> (accessed on).
- [36] Paclitaxel Albumin-Stabilized Nanoparticle Formulation in Treating Patients With Relapsed or Refractory Multiple Myeloma, (n.d.). (accessed on)
